# Supplementary material for: SWAT Modeling of Water Quantity and Quality in the Tennessee River Basin: Spatiotemporal Calibration and Validation
Source: Copernicus journal article supplement (doi:10.5194/hess-2016-34), 2016-01-25
Supplement: Supplementary file 1 [file hess-2016-34-supplement.pdf]

# **SWAT Modeling of Water Quantity and Quality in the Tennessee River Basin: Spatiotemporal Calibration and Validation**

## **Supplement**

Gangsheng Wang<sup>1,2,\*</sup>, Henriette I. Jager<sup>1,2</sup>, Latha M. Baskaran<sup>1</sup>, Tyler F. Baker<sup>3</sup>, Craig C. Brandt<sup>4</sup>

<sup>1</sup>Environmental Sciences Division, Oak Ridge National Laboratory, Oak Ridge, TN  
37831 USA

<sup>2</sup>Climate Change Science Institute, Oak Ridge National Laboratory, Oak Ridge, TN  
37831 USA

<sup>3</sup>Tennessee Valley Authority, Knoxville, TN 37902 USA

<sup>4</sup>Biosciences Division, Oak Ridge National Laboratory, Oak Ridge, TN 37831 USA

\*Corresponding Author: **Gangsheng Wang**

Bldg 4500N, Room F129S, MS-6301

Oak Ridge National Laboratory

Oak Ridge, TN 37831-6301

[wangg@ornl.gov](mailto:wangg@ornl.gov)

**Table S1. Types of SWAT Calibration**

| Type ID | Response variables                                                                                                                                                                          | Units                          | Notes                                                                                                                                                        |
|---------|---------------------------------------------------------------------------------------------------------------------------------------------------------------------------------------------|--------------------------------|--------------------------------------------------------------------------------------------------------------------------------------------------------------|
| 0       | Daily streamflow                                                                                                                                                                            | m <sup>3</sup> /s              | Parameter 1–14                                                                                                                                               |
| 2       | Daily reservoir storage                                                                                                                                                                     | 10 <sup>4</sup> m <sup>3</sup> | Parameter 1–14                                                                                                                                               |
| 3       | Daily soil water content                                                                                                                                                                    | mm                             | Parameter 1–14                                                                                                                                               |
| 10      | Monthly streamflow                                                                                                                                                                          | m <sup>3</sup> /s              | Parameter 1–14                                                                                                                                               |
| 11      | Monthly runoff: subbasin or HUC8                                                                                                                                                            | mm                             | Parameter 1–14                                                                                                                                               |
| 20      | Monthly Flux: nutrient <ul style="list-style-type: none"> <li>• NO<sub>3</sub>+NO<sub>2</sub></li> <li>• NO<sub>3</sub></li> <li>• TN</li> <li>• TP</li> <li>• Sediment</li> </ul>          | Metric tons                    | Parameter 15–39 <ul style="list-style-type: none"> <li>• TP = OrgP + SolP</li> <li>• TN = NO<sub>3</sub> + NO<sub>2</sub> + NH<sub>4</sub> + OrgN</li> </ul> |
| 21      | Monthly Flux: Sediment                                                                                                                                                                      | Metric tons                    | Parameter 15–21                                                                                                                                              |
| 22      | Monthly Flux: N <ul style="list-style-type: none"> <li>• TN</li> <li>• NO<sub>3</sub>+NO<sub>2</sub></li> <li>• NO<sub>3</sub></li> </ul>                                                   | Metric tons                    | Parameter 22–30                                                                                                                                              |
| 23      | Monthly Flux: TP                                                                                                                                                                            | Metric tons                    | Parameter 15–21, 31–39                                                                                                                                       |
| 24      | Monthly Flux: Sediment + TP                                                                                                                                                                 | Metric tons                    | Parameter 15–21, 31–39                                                                                                                                       |
| 30      | Monthly Concentration: nutrient <ul style="list-style-type: none"> <li>• NO<sub>3</sub>+NO<sub>2</sub></li> <li>• NO<sub>3</sub></li> <li>• TN</li> <li>• TP</li> <li>• Sediment</li> </ul> | mg/L                           | Parameter 15–39                                                                                                                                              |
| 31      | Monthly Concentration: Sediment                                                                                                                                                             | mg/L                           | Parameter 15–21                                                                                                                                              |
| 32      | Monthly Concentration: N <ul style="list-style-type: none"> <li>• TN</li> <li>• NO<sub>3</sub>+NO<sub>2</sub></li> <li>• NO<sub>3</sub></li> </ul>                                          | mg/L                           | Parameter 22–30                                                                                                                                              |
| 33      | Monthly Concentration: TP                                                                                                                                                                   | mg/L                           | Parameter 15–21, 31–39                                                                                                                                       |
| 34      | Monthly Concentration: Sediment + TP                                                                                                                                                        | mg/L                           | Parameter 15–21, 31–39                                                                                                                                       |

**Table S2. Model performance in calibration and validation of water quality**

| Analyte                          | Metrics <sup>a</sup> | Calibration<br>(1997–2006) | Validation<br>(2007–2013) | All<br>(1997–2013) |
|----------------------------------|----------------------|----------------------------|---------------------------|--------------------|
| Sediment                         | NSE                  | 0.06                       | -0.50                     | -0.18              |
|                                  | PBIAS (%)            | 21                         | 18                        | 20                 |
|                                  | r <sup>2</sup>       | 0.32                       | 0.06                      | 0.19               |
| TP                               | NSE                  | 0.44                       | -2.54                     | 0.09               |
|                                  | PBIAS (%)            | 2                          | -75                       | -25                |
|                                  | r <sup>2</sup>       | 0.47                       | 0.44                      | 0.27               |
| TN                               | NSE                  | 0.38                       | -0.32                     | 0.09               |
|                                  | PBIAS (%)            | -11                        | -54                       | -28                |
|                                  | r <sup>2</sup>       | 0.40                       | 0.44                      | 0.35               |
| NO <sub>3</sub> +NO <sub>2</sub> | NSE                  | -0.25                      | -2.79                     | -1.15              |
|                                  | PBIAS (%)            | -80                        | -157                      | -109               |
|                                  | r <sup>2</sup>       | 0.27                       | 0.27                      | 0.22               |

<sup>a</sup>NSE: Nash-Sutcliffe Efficiency; PBIAS: Percent Bias; r<sup>2</sup>: squared correlation coefficient.

# Figures

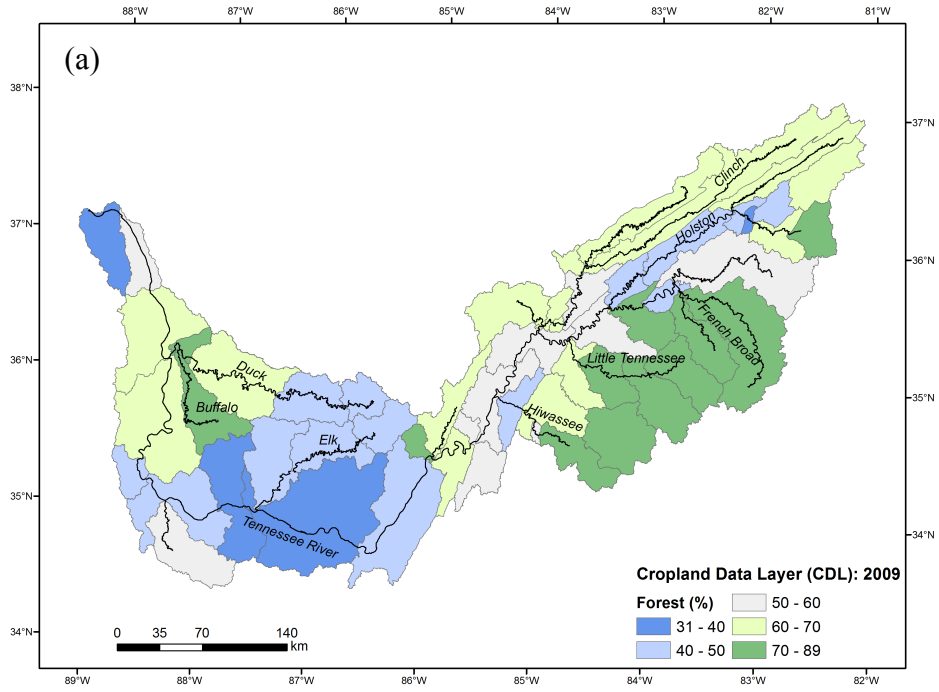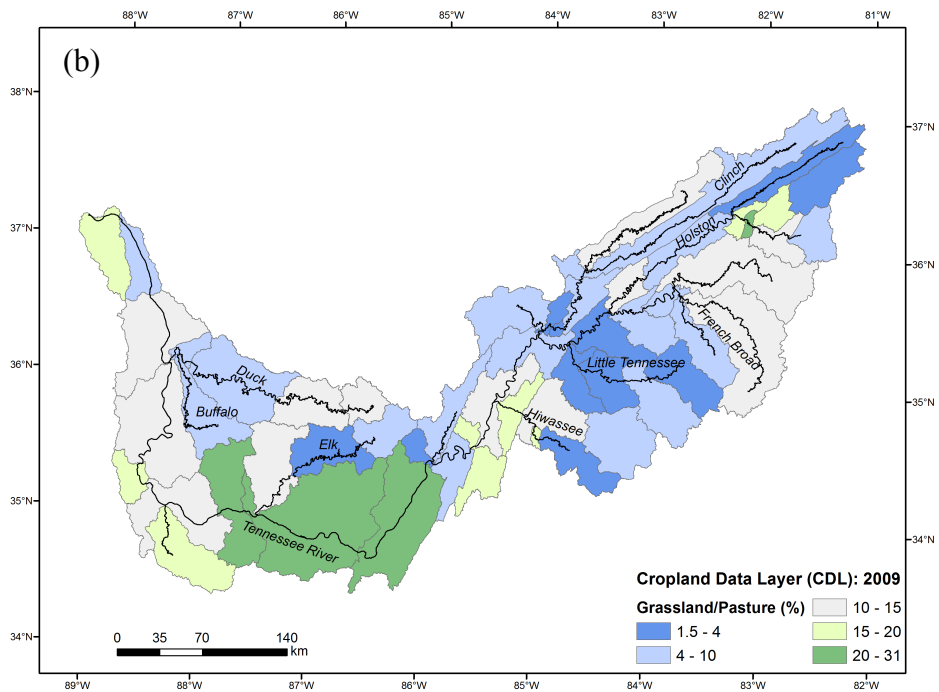

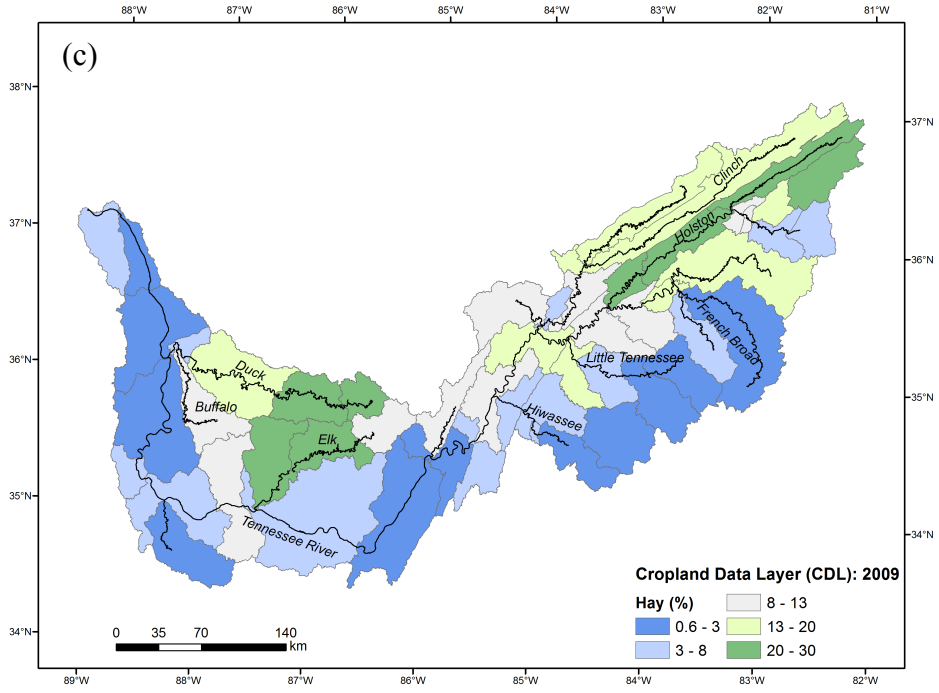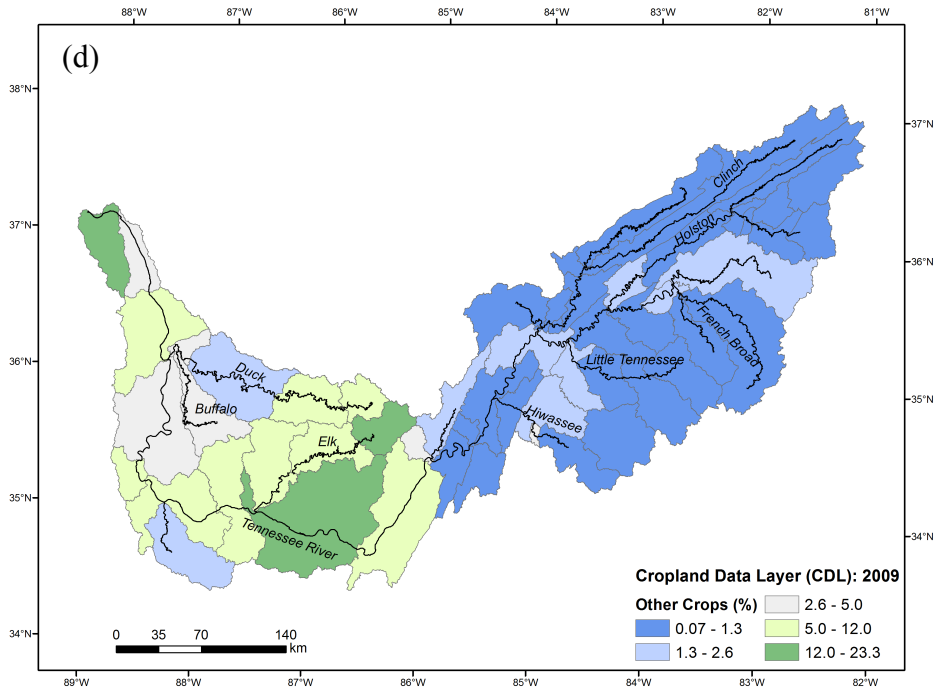

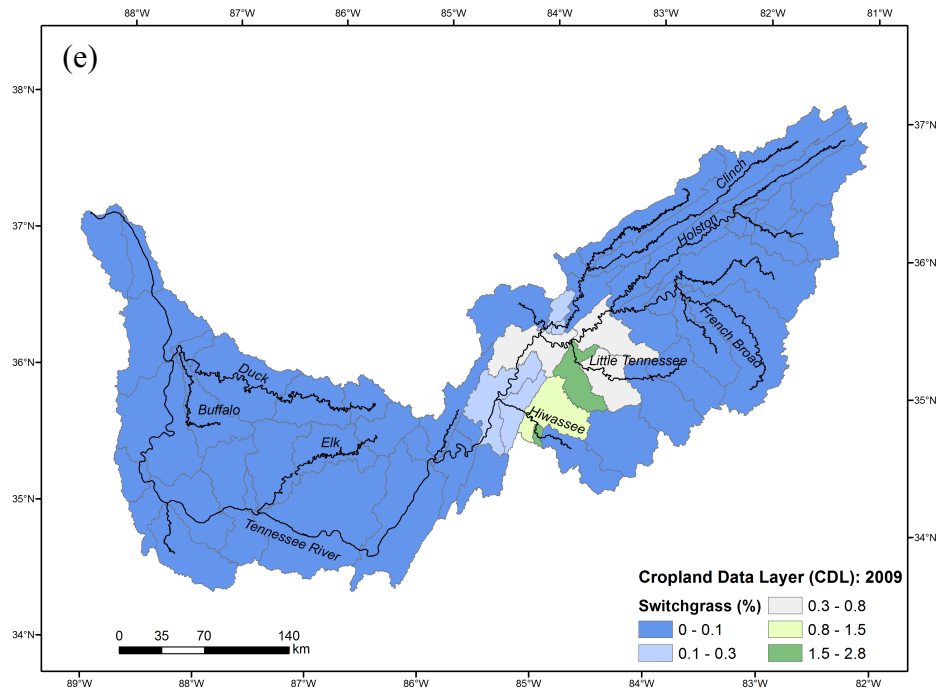

**Figure S1.** Fractions of land-cover types in 55 subbasins of the Tennessee River Basin. (a) Forest, (b) Grassland/Pasture, (c) Hay, (d) Other Crops, and (e) Switchgrass. Data source: Cropland Data Layer (CDL) 2009.

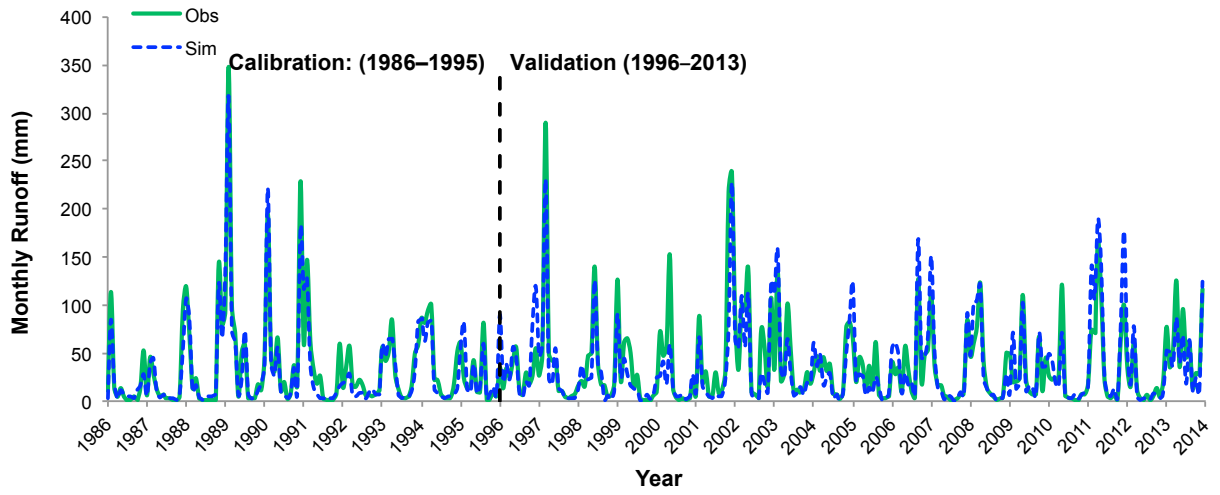

**Figure S2.** Comparison between SWAT-simulated (Sim) and USGS (Obs) monthly runoff in HUC8-06040006

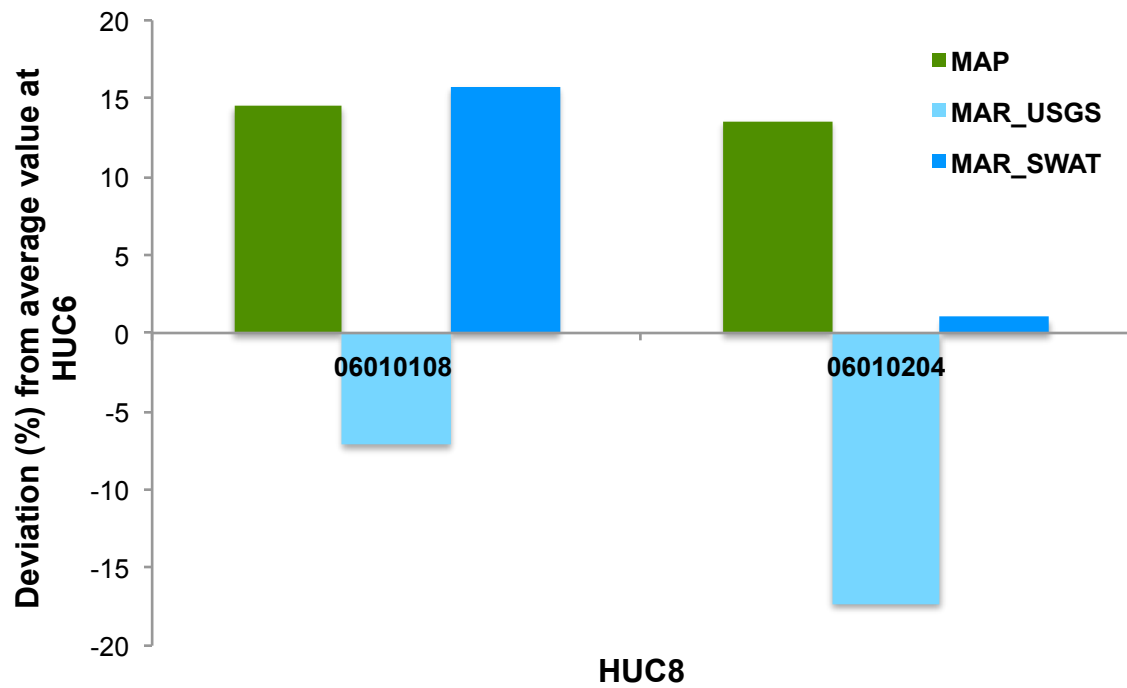

**Figure S3.** Percentage deviation between two HUC8s (06010108 and 06010204) and their respective HUC6 units (060101 and 060102) in mean annual precipitation (MAP) and USGS-estimated and SWAT-simulated mean annual runoff (MAR)



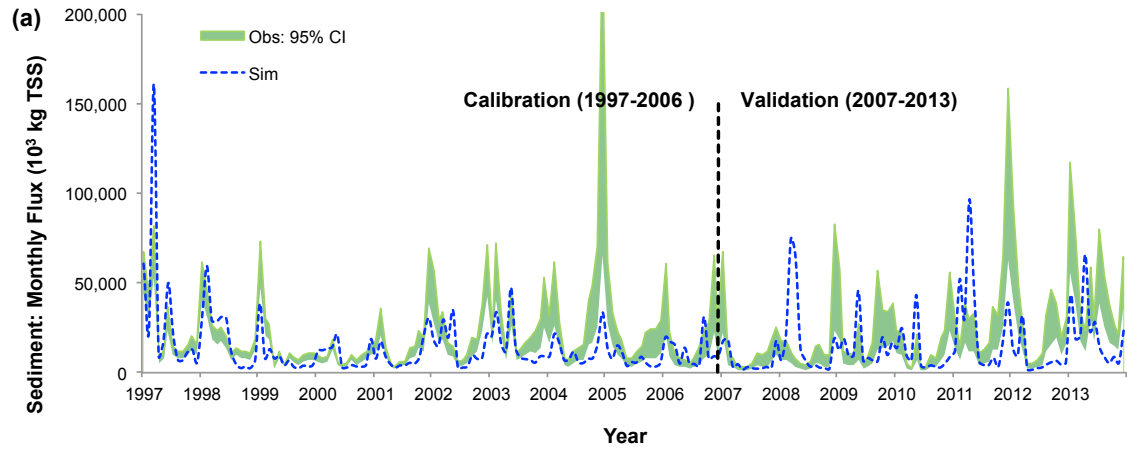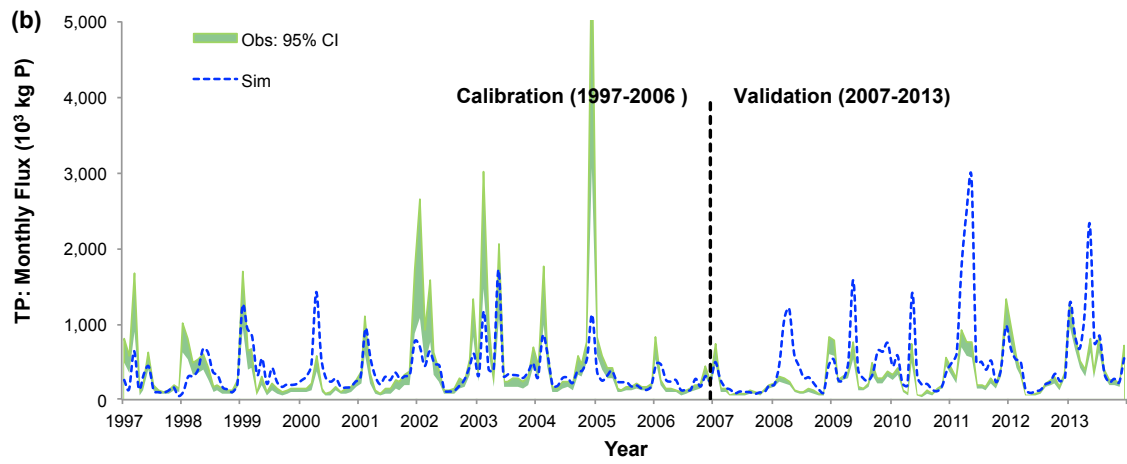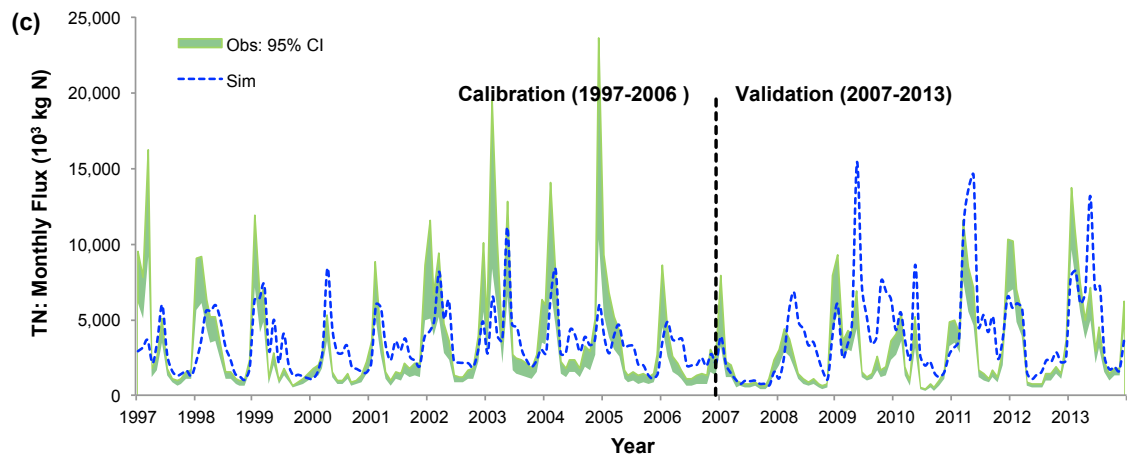

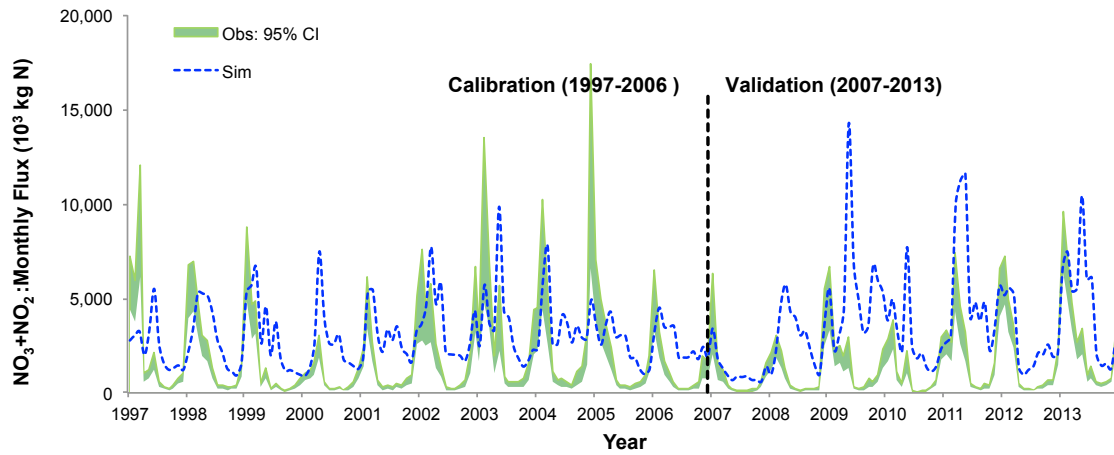

**Figure S4.** Comparison between SWAT-simulated (Sim) and LOADEST-estimated (Obs) monthly nutrient flux through the outlet of the Tennessee River Basin. (a) Sediment, (b) TP, (c) TN, (d) NO<sub>3</sub>+NO<sub>2</sub>. 95% CI denotes the 95% confidence interval on LOADEST estimates (Obs).

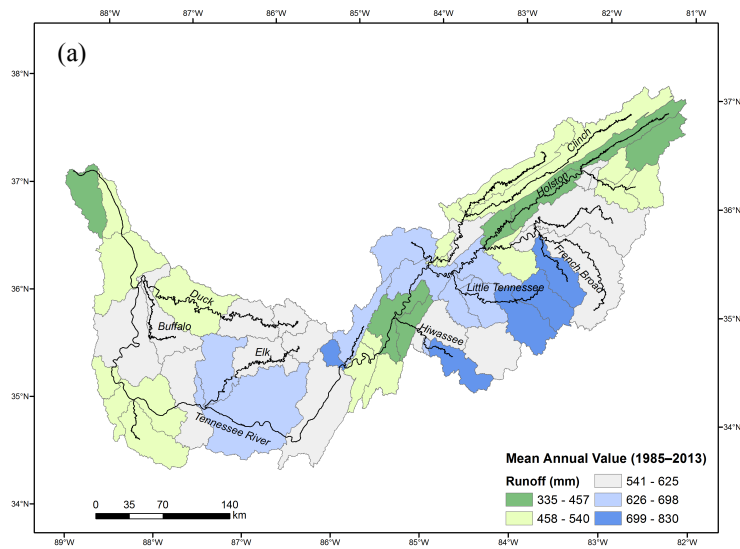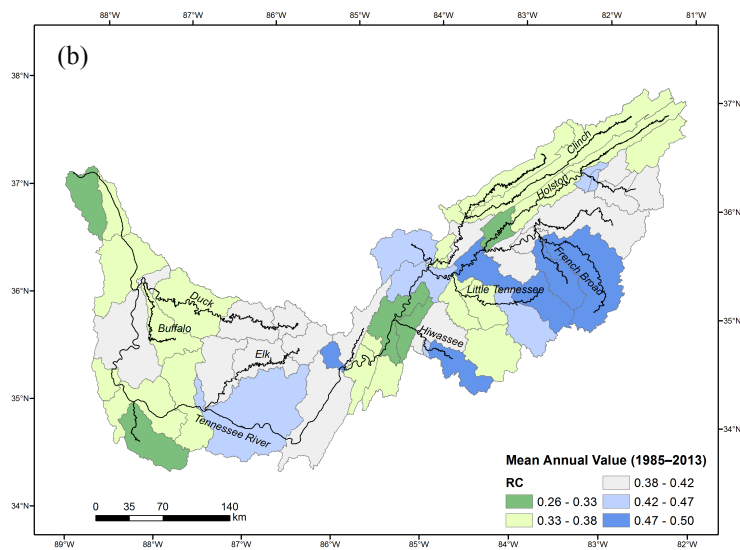

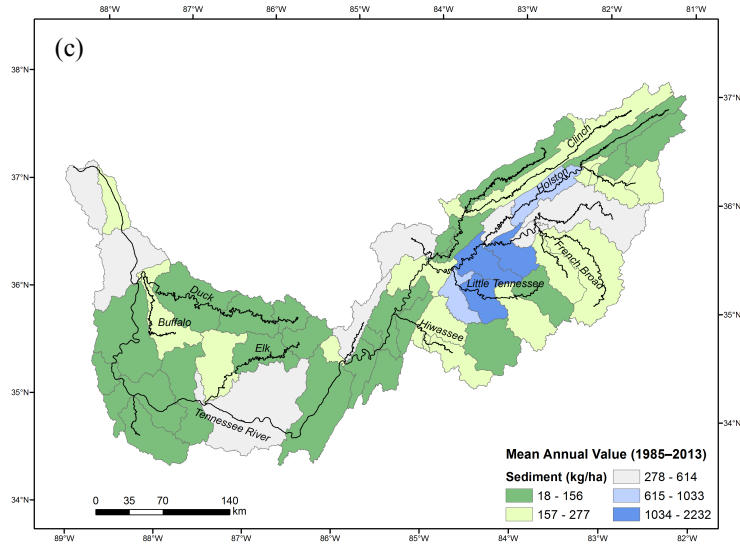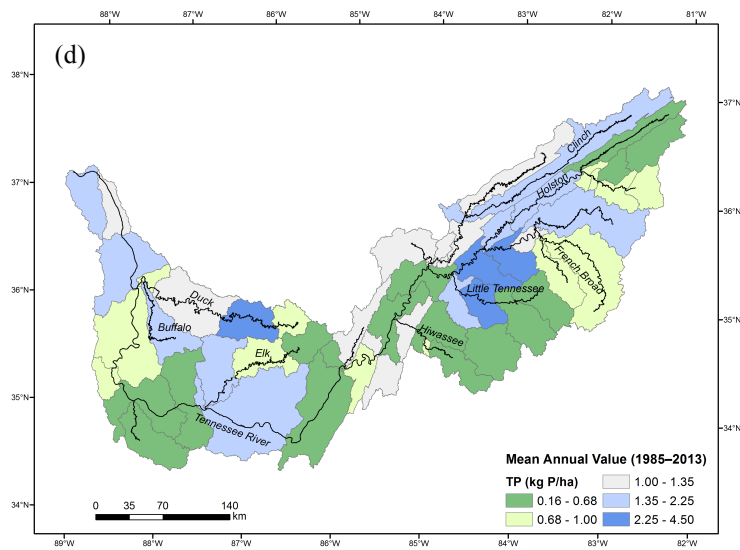

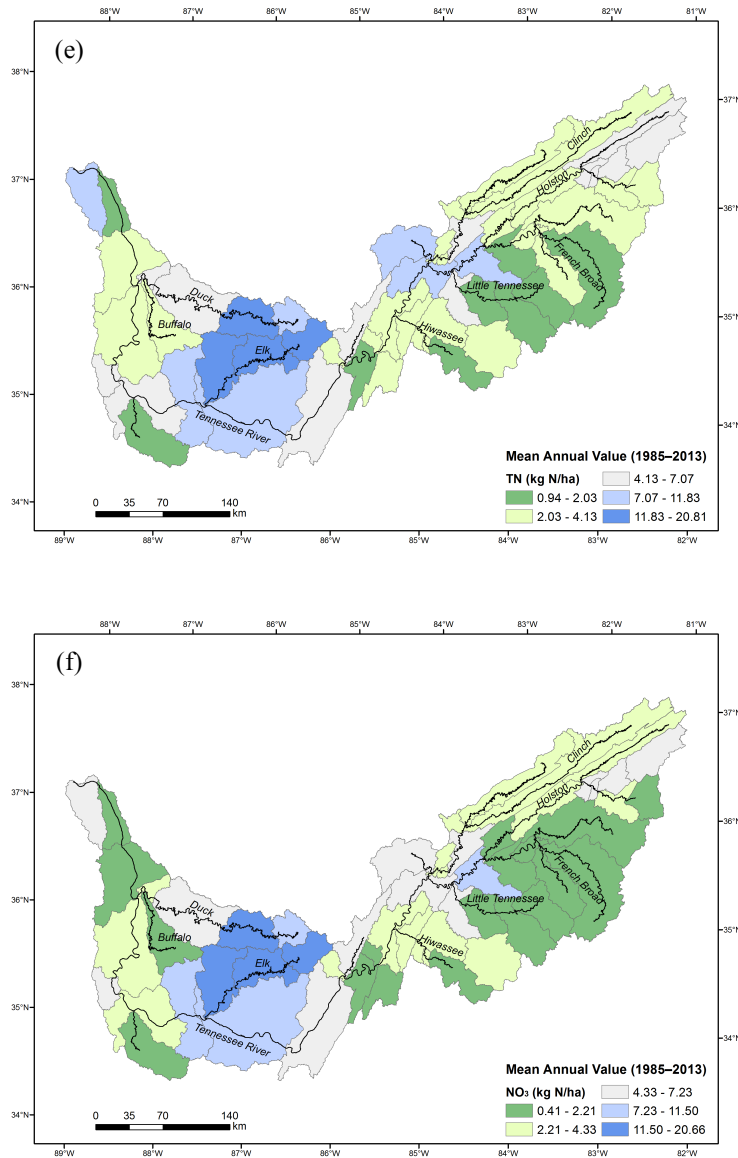

**Figure S5.** Spatial distribution of SWAT-simulated mean annual loads at 55 subbasins: (a) runoff (mm), (b) runoff coefficient (RC), (c) sediment loading (kg TSS/ha), (d) TP loading (kg P/ha), (e) TN loading (kg N/ha), (f) NO<sub>3</sub> (kg N/ha)
